# Supplementary material
Source: publisher site journal article supplement (https://www.dovepress.com/article/594201)
Supplement: Supplementary file 1 [file 594201_Supplementary%20material_1%20%25282%2529.docx]

**Table S1** The selection process of GBTM

| Group of inflammatory markers | Avepp | BIC | AIC | LL | Number of patients |
| --- | --- | --- | --- | --- | --- |
| **Group of ln(SIRI)** | | | | | |
| 2 groups (3, 3) | 0.78  0.87 | -1862.02 | -1842.06 | -1832.06 | 87 (21.8)  313 (78.2) |
| 3 groups (2, 1, 3) | 0.76  0.77  0.79 | -1853.59 | -1823.65 | -1808.65 | 281 (70.2)  37 (9.3)  82 (20.5) |
| 4 groups (3, 3, 3, 3) | 0.54  0.63  0.76  0.77 | -1872.95 | -1833.03 | -1813.03 | 99 (24.7)  82 (20.5)  11 (2.8)  208 (52) |
| 5 groups (3, 3, 3, 3, 3) | 0.50  0.59  0.63  0.68  0.81 | -1865.45 | -1815.55 | -1790.55 | 60 (15.0)  97 (24.2)  72 (18.0)  158 (39.5)  13 (3.3) |
| **Group of ln(SII)** | | | | | |
| 2 groups (3, 3) | 0.82  0.86 | -1595.33 | -1575.38 | -1565.38 | 176 (44.0)  224 (56.0) |
| 3 groups (1, 3, 3) | 0.72  0.77  0.81 | -1593.50 | -1563.57 | -1548.57 | 223 (55.7)  71 (17.8)  106 (26.5) |
| 4 groups (3, 3, 3, 3) | 0.57  0.78  0.79  0.88 | -1594.41 | -1554.49 | -1534.49 | 84 (21.0)  181 (45.2)  120 (30.0)  15 (3.8) |
| 5 groups (3, 3, 3, 3, 3) | 0.57  0.64  0.71  0.77  0.89 | -1585.87 | -1535.98 | -1510.98 | 80 (20.0)  113 (28.2)  105 (26.2)  85 (21.3)  17 (4.3) |
| **Group of ln(PIV)** | | | | | |
| 2 groups (3, 3) | 0.82  0.91 | -1709.51 | -1689.56 | -1679.56 | 50 (12.5)  350 (87.5) |
| 3 groups (2, 1, 3) | 0.79  0.81  0.86 | -1704.04 | -1680.09 | -1668.09 | 46 (11.5)  300 (75.0)  54 (13.5) |
| 4 groups (3, 3, 3, 3) | 0.66  0.69  0.76  0.79 | -1721.03 | -1681.12 | -1661.12 | 56 (14.0)  250 (62.5)  65 (16.2)  29 (7.3) |
| 5 groups (3, 3, 3, 3, 3) | 0.58  0.62  0.64  0.75  0.84 | -1719.41 | -1669.52 | -1644.52 | 88 (22.0)  207 (51.7)  9 (2.2)  67 (16.8)  29 (7.3) |
| **Group of ln(PLR)** | | | | | |
| 2 groups (3, 3) | 0.87  0.89 | -916.07 | -896.11 | -886.11 | 169 (42.2)  231 (57.8) |
| 3 groups (3, 3, 3) | 0.85  0.90  0.92 | -854.88 | -828.94 | -815.94 | 102 (25.5)  41 (10.3)  257 (64.2) |
| 4 groups (3, 3, 3, 3) | 0.66  0.74  0.84  0.88 | -865.92 | -826.00 | -806.00 | 121 (30.2)  176 (44.0)  67 (16.8)  36 (9.0) |
| 5 groups (3, 3, 3, 3, 3) | 0.80  0.84  0.84  0.88  0.96 | -863.81 | -813.92 | -788.92 | 48 (12.0)  9 (2.3)  95 (23.7)  240 (60.0)  8 (2.0) |
| **Group of ln(MLR)** | | | | | |
| 2 groups (3, 3) | 0.84  0.85 | -1201.86 | -1181.90 | -1171.90 | 187 (46.8)  213 (53.2) |
| 3 groups (3, 3, 3) | 0.78  0.81  0.81 | -1197.44 | -1167.51 | -1152.51 | 81 (20.2)  272 (68.0)  47 (12.8) |
| 4 groups (3, 3, 3, 3) | 0.57  0.69  0.74  0.81 | -1206.93 | -1167.02 | -1147.02 | 45 (11.2)  243 (60.7)  77 (19.3)  35 (8.8) |
| 5 groups (3, 3, 3, 3, 3) | 0.57  0.73  0.73  0.84  0.89 | -1214.51 | -1164.61 | -1139.61 | 38 (9.5)  240 (60.0)  86 (21.5)  31 (7.8)  5 (1.2) |
| **Group of ln(NLR)** | | | | | |
| 2 groups (3, 3) | 0.86  0.90 | -1540.07 | -1520.12 | -1510.12 | 126 (31.5)  274 (68.5) |
| 3 groups (1, 3, 3) | 0.81  0.82  0.90 | -1525.92 | -1499.97 | -1486.97 | 51 (12.8)  233 (58.2)  116 (29.0) |
| 4 groups (3, 3, 3, 3) | 0.72  0.72  0.77  0.78 | -1534.58 | -1494.67 | -1474.67 | 62 (15.5)  182 (45.5)  50 (12.5)  106 (26.8) |
| 5 groups (3, 3, 3, 3, 3) | 0.64  0.71  0.74  0.75  0.79 | -1524.86 | -1474.97 | -1449.97 | 50 (12.5)  185 (46.2)  20 (5.0)  58 (14.5)  87 (21.8) |
| **Group of ln(LMR)** | | | | | |
| 2 groups (3, 3) | 0.84  0.86 | -1202.73 | -1182.78 | -1172.78 | 161 (40.2)  239 (59.8) |
| 3 groups (3, 3, 1) | 0.77  0.83  0.84 | -1194.52 | -1168.57 | -1155.57 | 36 (9.0)  91 (22.8)  273 (68.2) |
| 4 groups (3, 3, 3, 3) | 0.60  0.71  0.75  0.79 | -1207.03 | -1167.12 | -1147.12 | 87 (21.7)  236 (59.0)  34 (8.5)  43 (10.8) |
| 5 groups (3, 3, 3, 3, 3) | 0.55  0.69  0.72  0.82  0.90 | -1213.02 | -1163.13 | -1138.13 | 62 (15.5)  205 (51.3)  99 (24.7)  29 (7.2)  5 (1.3) |
| **Group of WBC** | | | | | |
| 2 groups (3, 1) | 0.84  0.91 | -3519.65 | -3503.68 | -3495.68 | 83 (20.8)  317 (79.2) |
| 3 groups (3, 3, 3) | 0.80  0.84  0.89 | -3522.42 | -3492.49 | -3477.49 | 169 (42.2)  219 (54.8)  12 (3.0) |
| 4 groups (3, 3, 3, 3) | 0.66  0.67  0.81  0.93 | -3532.00 | -3492.08 | -3472.08 | 141 (35.2)  39 (9.8)  211 (52.8)  9 (2.2) |
| 5 groups (3, 3, 3, 3, 3) | 0.66  0.67  0.80  0.80  0.86 | -3536.96 | -3487.06 | -3462.06 | 150 (37.5)  48 (12.0)  6 (1.5)  188 (47.0)  8 (2.0) |
| **Group of N** | | | | | |
| 2 groups (1, 2) | 0.80  0.84 | -3280.06 | -3260.10 | -3250.10 | 163 (40.8)  237 (59.2) |
| 3 groups (3, 3, 3) | 0.76  0.90  0.91 | -3272.34 | -3242.41 | -3227.41 | 84 (21.0)  307 (76.7)  9 (2.3) |
| 4 groups (3, 3, 3, 3) | 0.62  0.67  0.77  0.88 | -3265.49 | -3225.58 | -3205.58 | 55 (13.7)  99 (24.8)  236 (59.0)  10 (2.5) |
| 5 groups (3, 3, 3, 3, 3) | 0.63  0.67  0.77  0.83  0.98 | -3273.08 | -3223.19 | -3198.19 | 81 (20.2)  29 (7.3)  13 (3.2)  270 (67.5)  7 (1.8) |
| **Group of M** | | | | | |
| 2 groups (3, 3) | 0.95  0.99 | -107.08 | -87.12 | -77.12 | 41 (10.2)  359 (89.8) |
| 3 groups (2, 2, 2) | 0.80  0.90  0.91 | -77.74 | -53.79 | -41.79 | 99 (24.8)  273 (68.2)  28 (7.0) |
| 4 groups (3, 3, 3, 3) | 0.82  0.89  0.93  0.99 | -96.81 | -56.90 | -36.90 | 116 (29.0)  252 (63.0)  30 (7.5)  2 (0.5) |
| 5 groups (3, 3, 3, 3, 3) | 0.80  0.85  0.90  0.91  0.92 | -52.43 | 7.44 | 37.44 | 121 (30.2)  8 (2.0)  12 (3.0)  240 (60.0)  19 (4.8) |
| **Group of L** | | | | | |
| 2 groups (3, 3) | 0.89  0.92 | -2624.79 | -2604.83 | -2594.83 | 153 (38.2)  247 (61.8) |
| 3 groups (3, 3, 3) | 0.86  0.88  0.89 | -2585.17 | -2555.23 | -2540.23 | 40 (10.0)  126 (31.5)  234 (58.5) |
| 4 groups (3, 3, 3, 3) | 0.81  0.84  0.89  0.90 | -2569.63 | -2529.71 | -2509.71 | 93 (23.2)  209 (52.3)  80 (20.0)  18 (4.5) |
| 5 groups (3, 3, 3, 3, 3) | 0.65  0.76  0.84  0.88  0.90 | -2573.72 | -2523.83 | -2498.83 | 42 (10.5)  72 (18.0)  198 (49.5)  17 (4.3)  71 (17.7) |
| **Group of PLT** | | | | | |
| 2 groups (3, 3) | 0.90  0.94 | -7161.50 | -7141.54 | -7131.54 | 135 (33.7)  265 (66.3) |
| 3 groups (3, 3, 3) | 0.80  0.88  0.88 | -7148.65 | -7118.71 | -7103.71 | 157 (39.3)  163 (40.7)  80 (20.0) |
| 4 groups (3, 3, 3, 3) | 0.77  0.79  0.83  0.88 | -7149.88 | -7126.97 | -7116.97 | 53 (13.2)  156 (39.0)  38 (9.5)  153 (38.3) |
| 5 groups (3, 3, 3, 3, 3) | 0.74  0.76  0.79  0.82  0.84 | -7161.37 | -7111.48 | -7086.48 | 10 (2.5)  40 (10.0)  153 (38.2)  43 (10.8)  154 (38.5) |

**Abbreviations:** Avepp, Average posterior probability; BIC, Bayesian Information Criterion; AIC, Akaike Information Criterion; LL, Log-likelihood; SIRI, Systemic Inflammatory Response Index; PIV, Pan-Immune Inflammation Value; SII, Systemic Immune-Inflammation Index; PLR, Platelet-to-Lymphocyte Ratio; MLR, Monocyte-to-Lymphocyte Ratio; NLR, Neutrophil-to-Lymphocyte Ratio; LMR, Lymphocyte-to-Monocyte Ratio, WBC, white blood cells; N, neutrophils; M, monocytes; L, lymphocytes; PLT, platelets.

**Table S2** Collinearity Statistics

| Variables | VIF |
| --- | --- |
| Feeding method | 1.18 |
| Surgical age | 1.14 |
| Preoperative nutritional status | 1.23 |
| Preoperative HAEC | 1.18 |
| Preoperative hypoalbuminemia | 1.19 |
| Residence | 1.03 |
| Relationship of caregivers | 1.17 |
| Type of HSCR | 1.28 |
| Mild postoperative complications | 1.17 |

**Abbreviations:** HAEC, Hirschsprung-associated enterocolitis; HSCR, Hirschsprung disease; VIF, variance inflation factor.

**Table S3** Univariate/multivariate logistic regression analyses of inflammatory marker trajectories for postoperative HAEC

| Inflammatory markers | Univariate |  | Multivariate |  |
| --- | --- | --- | --- | --- |
| OR (95% CI) | P value | OR (95% CI) | P value |
| **ln(SIRI)** |  |  |  |  |
| Trajectory 2 | 4.15 (1.43 ~ 12.05) | 0.009 | 5.20 (1.46 ~ 18.45) | 0.011 |
| Trajectory 3 | 6.14 (1.99 ~ 18.95) | 0.002 | 4.73 (1.22 ~ 18.37) | 0.025 |
| **ln(SII)** |  |  |  |  |
| Trajectory 2 | 1.26 (0.65 ~ 2.42) | 0.495 | 1.79 (0.77 ~ 4.13) | 0.175 |
| Trajectory 3 | 1.37 (0.76 ~ 2.46) | 0.290 | 1.89 (0.93 ~ 3.85) | 0.078 |
| **ln(PIV)** |  |  |  |  |
| Trajectory 2 | 4.16 (1.60 ~ 10.86) | 0.004 | 4.75 (1.54 ~ 14.63) | 0.007 |
| Trajectory 3 | 8.20 (2.81 ~ 23.92) | < 0.001 | 5.63 (1.56 ~ 20.26) | 0.008 |
| **ln(PLR)** |  |  |  |  |
| Trajectory 2 | 0.62 (0.32 ~ 1.21) | 0.165 | 0.75 (0.34 ~ 1.64) | 0.466 |
| Trajectory 3 | 0.36 (0.17 ~ 0.77) | 0.008 | 0.41 (0.15 ~ 1.10) | 0.077 |
| **ln(MLR)** |  |  |  |  |
| Trajectory 2 | 1.30 (0.68 ~ 2.48) | 0.421 | 0.98 (0.47 ~ 2.03) | 0.948 |
| Trajectory 3 | 2.27 (1.10 ~ 4.69) | 0.027 | 1.33 (0.55 ~ 3.26) | 0.528 |
| **ln(NLR)** |  |  |  |  |
| Trajectory 2 | 1.94 (0.96 ~ 3.90) | 0.064 | 1.86 (0.84 ~ 4.11) | 0.125 |
| Trajectory 3 | 1.35 (0.63 ~ 2.88) | 0.442 | 2.12 (0.82 ~ 5.51) | 0.122 |
| **ln(LMR)** |  |  |  |  |
| Trajectory 2 | 0.71 (0.44 ~ 1.17) | 0.180 | 1.00 (0.53 ~ 1.89) | 0.998 |
| Trajectory 3 | 0.59 (0.25 ~ 1.36) | 0.216 | 1.15 (0.41 ~ 3.19) | 0.788 |
| **WBC** |  |  |  |  |
| Trajectory 2 | 3.74 (2.27 ~ 6.18) | < 0.001 | 2.49 (1.35 ~ 4.59) | 0.004 |
| **N** |  |  |  |  |
| Trajectory 2 | 1.73 (1.13 ~ 2.63) | 0.011 | 2.53 (1.50 ~ 4.28) | 0.001 |
| **M** |  |  |  |  |
| Trajectory 2 | 1.32 (0.81 ~ 2.15) | 0.265 | 0.82 (0.44 ~ 1.53) | 0.535 |
| Trajectory 3 | 4.34 (1..92 ~ 9.82) | < 0.001 | 1.98 (0.69 ~ 5.68) | 0.204 |
| **L** |  |  |  |  |
| Trajectory 2 | 1.98 (1.21 ~ 3.24) | 0.007 | 1.57 (0.78 ~ 3.14) | 0.203 |
| Trajectory 3 | 2.47 (1.17 ~ 5.24) | 0.018 | 1.79 (0.68 ~ 4.75) | 0.242 |
| **PLT** |  |  |  |  |
| Trajectory 2 | 1.03 (0.64 ~ 1.65) | 0.898 | 0.71 (0.39 ~ 1.29) | 0.261 |
| Trajectory 3 | 1.28 (0.73 ~ 2.26) | 0.385 | 0.88 (0.43 ~ 1.79) | 0.723 |

**Notes:** All reference groups are trajectory 1.

**Abbreviations:** HAEC, Hirschsprung-associated enterocolitis; SIRI, Systemic Inflammatory Response Index; PIV, Pan-Immune Inflammation Value; SII, Systemic Immune-Inflammation Index; PLR, Platelet-to-Lymphocyte Ratio; MLR, Monocyte-to-Lymphocyte Ratio; NLR, Neutrophil-to-Lymphocyte Ratio; LMR, Lymphocyte-to-Monocyte Ratio, WBC, white blood cells; N, neutrophils; M, monocytes; L, lymphocytes; PLT, platelets.

**Table S4** Baseline characteristics according to trajectory group of ln(SIRI)

| Variables | Trajectory 1 (n = 37) | Trajectory 2 (n = 281) | Trajectory 3 (n = 82) | P value |
| --- | --- | --- | --- | --- |
| Sex | | | | 0.905 |
| Male | 32 (86.5) | 235 (83.6) | 69 (84.1) |  |
| Female | 5 (13.5) | 46 (16.4) | 13 (15.9) |  |
| Gestational age (week) | | | | 0.356 |
| ≥ 37 | 37 (100.0) | 266 (94.7) | 78 (95.1) |  |
| < 37 | 0 (0.0) | 15 (5.3) | 4 (4.9) |  |
| Birth weight (kg) | | | | 0.887 |
| ≥ 2.5 | 36 (97.3) | 269 (95.7) | 79 (96.3) |  |
| < 2.5 | 1 (2.7) | 12 (4.3) | 3 (3.7) |  |
| Feeding method | | | | 0.270 |
| Breast feeding | 25 (67.6) | 168 (59.8) | 40 (48.8) |  |
| Mixed feeding | 7 (18.9) | 54 (19.2) | 19 (23.2) |  |
| Formula feeding | 5 (13.5) | 59 (21.0) | 23 (28.0) |  |
| Surgical age (month) |  |  |  | < 0.001 |
| ≤ 1 | 6 (16.2) | 38 (13.5) | 26 (31.7) |  |
| > 1-12 | 27 (73.0) | 153 (54.4) | 29 (35.4) |  |
| > 12-36 | 4 (10.8) | 64 (22.8) | 20 (24.4) |  |
| > 36 | 0 (0.0) | 26 (9.3) | 7 (8.5) |  |
| Preoperative nutritional status | | | | 0.104 |
| Normal | 28 (75.7) | 199 (70.8) | 47 (57.3) |  |
| Risk of malnutrition | 5 (13.5) | 46 (16.4) | 16 (19.5) |  |
| Malnutrition | 4 (10.8) | 36 (12.8) | 19 (23.2) |  |
| Preoperative HAEC | | | | 0.076 |
| No | 30 (91.1) | 194 (69.0) | 49 (59.8) |  |
| Yes | 7 (18.9) | 87 (31.0) | 33 (40.2) |  |
| Preoperative hypoalbuminemia | | | | 0.003 |
| No | 31 (83.8) | 230 (81.9) | 53 (64.6) |  |
| Yes | 6 (16.2) | 51 (18.1) | 29 (35.4) |  |
| Associated malformations | | | | 0.430 |
| No | 32 (86.5) | 260 (92.5) | 76 (92.7) |  |
| Yes | 5 (13.5) | 21 (7.5) | 6 (7.3) |  |
| Residence | | | | 0.143 |
| Urban | 14 (37.8) | 142 (50.5) | 47 (57.3) |  |
| Rural | 23 (62.2) | 139 (49.5) | 35 (42.7) |  |
| Relationship of caregivers | | | | 0.644 |
| Parents | 32 (86.5) | 229 (81.5) | 65 (79.3) |  |
| Others | 5 (13.5) | 52 (18.5) | 17 (20.7) |  |
| Educational level of caregivers | | | | 0.270 |
| Secondary and tertiary | 18 (48.6) | 166 (59.1) | 42 (51.2) |  |
| Primary and below | 19 (51.4) | 115 (40.9) | 40 (48.8) |  |
| Insurance type | | | | 0.530 |
| Private or self-pay | 3 (8.1) | 39 (13.9) | 9 (11.0) |  |
| Public | 34 (91.9) | 242 (86.1) | 73 (89.0) |  |
| Type of HSCR | | | | 0.057 |
| S-HSCR | 33 (89.2) | 256 (91.1) | 67 (81.7) |  |
| L-HSCR | 4 (10.8) | 25 (8.9) | 15 (18.3) |  |
| Surgical time (minute) | 144.2 ± 37.4 | 140.0 ± 23.7 | 139.2 ± 23.9 | 0.659 |
| Length of postoperative hospital stay (days) | 11 (10,16) | 11 (9,15) | 13 (9,31) | 0.013 |
| Mild postoperative complications | | | | 0.011 |
| No | 30 (81.1) | 222 (79.0) | 52 (63.4) |  |
| Yes | 7 (18.9) | 59 (21.0) | 30 (36.2) |  |
| Postoperative HAEC | | | | 0.003 |
| No | 33 (89.2) | 187 (66.5) | 47 (57.3) |  |
| Yes | 4 (10.8) | 94 (33.5) | 35 (42.7) |  |
| ln(SIRI1) | -2.44 ± 0.97 | -1.53 ± 0.68 | -0.60 ± 0.80 | < 0.001 |
| N1 (109/L) | 2.23 ± 1.59 | 3.34 ± 1.43 | 4.62 ± 1.95 | < 0.001 |
| M1 (109/L) | 0.29 ± 0.18 | 0.39 ± 0.20 | 0.67 ± 0.38 | < 0.001 |
| L1 (109/L) | 5.69 ± 1.99 | 5.26 ± 2.01 | 4.74 ± 1.95 | 0.023 |
| ln(SIRI2) | -1.92 ± 1.19 | 0.15 ± 0.77 | 0.41 ± 0.92 | < 0.001 |
| N2 (109/L) | 3.62 ± 2.32 | 8.29 ± 3.20 | 8.54 ± 3.61 | < 0.001 |
| M2 (109/L) | 0.22 ± 0.12 | 0.46 ± 0.23 | 0.53 ± 0.30 | < 0.001 |
| L2 (109/L) | 3.83 ± 1.44 | 3.14 ± 1.66 | 2.83 ± 1.68 | 0.004 |
| ln(SIRI3) | -0.29 ± 0.83 | -0.49 ± 0.71 | 0.07 ± 0.73 | < 0.001 |
| N3 (109/L) | 4.03 ± 1.82 | 5.49 ± 2.61 | 6.66 ± 3.22 | 0.001 |
| M3 (109/L) | 0.37 ± 0.25 | 0.56 ± 0.25 | 0.77 ± 0.46 | < 0.001 |
| L3 (109/L) | 4.54 ± 2.42 | 4.40 ± 1.68 | 3.90 ± 1.42 | 0.141 |
| ln(SIRI4) | -1.28 ± 0.72 | -0.81 ± 0.67 | -0.12 ± 0.73 | < 0.001 |
| N4 (109/L) | 3.68 ± 1.74 | 4.36 ± 1.82 | 5.60 ± 2.25 | < 0.001 |
| M4 (109/L) | 0.46 ± 0.20 | 0.52 ± 0.26 | 0.81 ± 0.48 | < 0.001 |
| L4 (109/L) | 5.30 ± 1.65 | 4.47 ± 1.71 | 4.43 ± 1.81 | 0.016 |

**Abbreviations:** HAEC, Hirschsprung-associated enterocolitis; HSCR, Hirschsprung disease; S-HSCR, short segment HSCR; L-HSCR, long segment HSCR. SIRI, Systemic Inflammatory Response Index; SIRI1, SIRI at T1; N1, neutrophil count at T1; L1, lymphocyte count at T1; M1, monocyte count at T1; SIRI2, SIRI at T2; N2, neutrophil count at T2; L2, lymphocyte count at T2; M2, monocyte count at T2; SIRI3, SIRI at T3; N3, neutrophil count at T3; L3, lymphocyte count at T3; M3, monocyte count at T3; SIRI4, SIRI at T4; N4, neutrophil count at T4; L4, lymphocyte count at T4; M4, monocyte count at T4.

**Table S5** Baseline characteristics according to trajectory group of ln(PIV)

| Variables | Trajectory 1 (n = 46) | Trajectory 2 (n = 300) | Trajectory 3 (n = 54) | P value |
| --- | --- | --- | --- | --- |
| Sex | | | | 0.981 |
| Male | 39 (84.8) | 252 (84.0) | 45 (83.3) |  |
| Female | 7 (15.2) | 48 (16.0) | 9 (16.7) |  |
| Gestational age (week) | | | | 0.910 |
| ≥ 37 | 44 (95.7) | 285 (95.0) | 52 (96.3) |  |
| < 37 | 2 (4.3) | 15 (5.0) | 2 (3.7) |  |
| Birth weight (kg) | | | | 0.687 |
| ≥ 2.5 | 44 (95.7) | 287 (95.7) | 53 (98.1) |  |
| < 2.5 | 2 (4.3) | 13 (4.3) | 1 (1.9) |  |
| Feeding method | | | | 0.020 |
| Breast feeding | 33 (71.7) | 176 (58.7) | 24 (44.4) |  |
| Mixed feeding | 7 (15.2) | 63 (21.0) | 10 (18.5) |  |
| Formula feeding | 6 (13.1) | 61 (20.3) | 20 (37.1) |  |
| Surgical age (month) | | | | < 0.001 |
| ≤ 1 | 7 (15.2) | 41 (13.7) | 22 (40.7) |  |
| > 1-12 | 31 (67.4) | 155 (51.6) | 23 (42.6) |  |
| > 12-36 | 6 (31.1) | 77 (25.7) | 5 (9.3) |  |
| > 36 | 2 (4.3) | 27 (9.0) | 4 (7.4) |  |
| Preoperative nutritional status | | | | 0.128 |
| Normal | 35 (76.1) | 209 (69.7) | 30 (55.6) |  |
| Risk of malnutrition | 8 (17.4) | 46 (15.3) | 13 (24.1) |  |
| Malnutrition | 3 (6.5) | 45 (15.0) | 11 (20.3) |  |
| Preoperative HAEC | | | | 0.117 |
| No | 34 (73.9) | 209 (69.7) | 30 (55.6) |  |
| Yes | 12 (26.1) | 91 (30.3) | 23 (44.4) |  |
| Preoperative hypoalbuminemia | | | | 0.069 |
| No | 38 (82.6) | 240 (80.0) | 36 (66.7) |  |
| Yes | 8 (17.4) | 60 (20.0) | 18 (33.3) |  |
| Associated malformations | | | | 0.348 |
| No | 40 (87.0) | 279 (93.0) | 49 (90.7) |  |
| Yes | 6 (13.0) | 21 (7.0) | 5 (9.3) |  |
| Residence | | | | 0.900 |
| Urban | 22 (47.8) | 154 (51.3) | 27 (50.0) |  |
| Rural | 24 (52.2) | 146 (48.7) | 27 (50.0) |  |
| Relationship of caregivers | | | | 0.086 |
| Parents | 41 (89.1) | 246 (82.0) | 39 (72.2) |  |
| Others | 5 (10.9) | 54 (18.0) | 15 (27.8) |  |
| Educational level of caregivers | | | | 0.318 |
| Secondary and tertiary | 23 (50.0) | 176 (58.7) | 27 (50.0) |  |
| Primary and below | 23 (50.0) | 124 (41.3) | 27 (50.0) |  |
| Insurance type | | | | 0.340 |
| Private or self-pay | 3 (6.5) | 42 (14.0) | 6 (11.1) |  |
| Public | 43 (93.5) | 258 (86.0) | 48 (88.9) |  |
| Type of HSCR | | | | 0.001 |
| S-HSCR | 42 (91.3) | 274 (91.3) | 40 (74.1) |  |
| L-HSCR | 4 (8.7) | 26 (8.7) | 14 (25.9) |  |
| Surgical time (minute) | 142.7 ± 34.0 | 139.2 ± 24.0 | 143.6 ± 23.7 | 0.239 |
| Length of postoperative hospital stay (days) | 11 (10,16) | 11 (9,17) | 11 (9,31) | 0.276 |
| Mild postoperative complications | | | | 0.998 |
| No | 35 (76.1) | 228 (76.0) | 41 (75.9) |  |
| Yes | 11 (23.9) | 72 (24.0) | 13 (24.1) |  |
| Postoperative HAEC | | | | < 0.001 |
| No | 41 (89.1) | 199 (66.3) | 27 (50.0) |  |
| Yes | 5 (10.9) | 101 (33.7) | 27 (50.0) |  |
| ln(PIV1) | 3.57 ± 0.91 | 4.55 ± 0.80 | 5.86 ± 0.69 | < 0.001 |
| N1 (109/L) | 2.42 ± 1.59 | 3.41 ± 1.50 | 4.92 ± 1.92 | < 0.001 |
| M1 (109/L) | 0.30 ± 0.19 | 0.41 ± 0.24 | 0.72 ± 0.32 | < 0.001 |
| L1 (109/L) | 5.74 ± 1.94 | 5.15 ± 2.04 | 4.97 ± 1.80 | 0.094 |
| PLT1 (109/L) | 373.2 ± 109.1 | 428.7 ± 129.6 | 567.3 ± 152.3 | < 0.001 |
| ln(PIV2) | 4.17 ± 1.25 | 5.98 ± 0.86 | 6.71 ± 0.80 | < 0.001 |
| N2 (109/L) | 4.36 ± 2.44 | 8.14 ± 3.15 | 9.73 ± 4.09 | < 0.001 |
| M2 (109/L) | 0.26 ± 0.18 | 0.45 ± 0.23 | 0.63 ± 0.27 | < 0.001 |
| L2 (109/L) | 3.81 ± 1.98 | 3.05 ± 1.65 | 3.07 ± 1.27 | 0.032 |
| PLT2 (109/L) | 295.1 ± 84.1 | 364.9 ± 107.8 | 455.7 ± 124.5 | < 0.001 |
| ln(PIV3) | 4.29 ± 0.66 | 5.53 ± 0.74 | 6.26 ± 0.69 | < 0.001 |
| N3 (109/L) | 3.76 ± 1.59 | 5.59 ± 2.56 | 7.05 ± 3.45 | 0.001 |
| M3 (109/L) | 0.33 ± 0.21 | 0.58 ± 0.25 | 0.84 ± 0.49 | < 0.001 |
| L3 (109/L) | 4.49 ± 2.67 | 4.31 ± 1.53 | 4.04 ± 1.51 | 0.495 |
| PLT3 (109/L) | 319.6 ± 108.8 | 397.8 ± 110.5 | 455.4 ± 140.0 | < 0.001 |
| ln(PIV4) | 4.43 ± 0.70 | 5.16 ± 0.69 | 6.37 ± 0.66 | < 0.001 |
| N4 (109/L) | 3.48 ± 1.62 | 4.37 ± 1.78 | 6.55 ± 2.18 | < 0.001 |
| M4 (109/L) | 0.42 ± 0.18 | 0.53 ± 0.26 | 0.97 ± 0.49 | < 0.001 |
| L4 (109/L) | 5.01 ± 1.70 | 4.44 ± 1.75 | 4.70 ± 1.68 | 0.093 |
| PLT4 (109/L) | 352.0 ± 118.2 | 397.2 ± 119.8 | 497.3 ± 129.9 | < 0.001 |

**Abbreviations:** HAEC, Hirschsprung-associated enterocolitis; HSCR, Hirschsprung disease; S-HSCR, short segment HSCR; L-HSCR, long segment HSCR. PIV, Pan-Immune Inflammation Value; PIV1, PIV at T1; N1, neutrophil count at T1; L1, lymphocyte count at T1; M1, monocyte count at T1; PLT1, platelet count at T1; PIV2, PIV at T2; N2, neutrophil count at T2; L2, lymphocyte count at T2; M2, monocyte count at T2; PLT2, platelet count at T2; PIV3, PIV at T3; N3, neutrophil count at T3; L3, lymphocyte count at T3; M3, monocyte count at T3; PLT3, platelet count at T3; PIV4, PIV at T4; N4, neutrophil count at T4; L4, lymphocyte count at T4; M4, monocyte count at T4; PLT4, platelet count at T4.

**Table S6** Baseline characteristics according to trajectory group of WBC

| Variables | Trajectory 1 (n = 317) | Trajectory 2 (n = 83) | P value |
| --- | --- | --- | --- |
| Sex | | | 0.809 |
| Male | 267 (84.2) | 69 (83.1) |  |
| Female | 50 (15.8) | 14 (16.9) |  |
| Gestational age (week) | | | 0.585 |
| ≥ 37 | 301 (95.0) | 80 (96.4) |  |
| < 37 | 16 (5.0) | 3 (3.6) |  |
| Birth weight (kg) | | | 0.406 |
| ≥ 2.5 | 303 (95.6) | 81 (97.6) |  |
| < 2.5 | 14 (4.4) | 2 (2.4) |  |
| Feeding method | | | 0.098 |
| Breast feeding | 188 (59.3) | 45 (54.2) |  |
| Mixed feeding | 67 (21.1) | 13 (15.7) |  |
| Formula feeding | 62 (19.6) | 25 (30.1) |  |
| Surgical age (month) | | | < 0.001 |
| ≤ 1 | 43 (13.6) | 27 (32.6) |  |
| > 1-12 | 163 (51.4) | 46 (55.4) |  |
| > 12-36 | 79 (24.9) | 9 (10.8) |  |
| > 36 | 32 (10.1) | 1 (1.2) |  |
| Preoperative nutritional status | | | 0.124 |
| Normal | 223 (70.3) | 51 (61.4) |  |
| Risk of malnutrition | 53 (16.8) | 14 (16.9) |  |
| Malnutrition | 41 (12.9) | 18 (21.7) |  |
| Preoperative HAEC | | | < 0.001 |
| No | 233 (73.5) | 40 (48.2) |  |
| Yes | 83 (26.5) | 43 (51.8) |  |
| Preoperative hypoalbuminemia | | | 0.518 |
| No | 251 (79.2) | 63 (75.9) |  |
| Yes | 66 (20.8) | 20 (24.1) |  |
| Associated malformations | | | 0.015 |
| No | 297 (93.7) | 71 (85.5) |  |
| Yes | 20 (6.3) | 12 (14.5) |  |
| Residence | | | 0.229 |
| Urban | 156 (47.8) | 47 (56.6) |  |
| Rural | 161 (52.2) | 36 (43.4) |  |
| Relationship of caregivers | | | 0.035 |
| Parents | 265 (83.5) | 61 (73.5) |  |
| Others | 52 (16.5) | 22 (26.5) |  |
| Educational level of caregivers | | | 0.472 |
| Secondary and tertiary | 182 (57.4) | 44 (53.0) |  |
| Primary and below | 135 (42.6) | 39 (47.0) |  |
| Insurance type | | | 0.600 |
| Private or self-pay | 39 (12.3) | 12 (14.5) |  |
| Public | 278 (87.7) | 71 (85.5) |  |
| Type of HSCR | | | 0.002 |
| S-HSCR | 290 (91.5) | 66 (79.9) |  |
| L-HSCR | 27 (8.5) | 17 (20.1) |  |
| Surgical time (minute) | 139.1 ± 24.5 | 144.4 ± 27.7 | 0.038 |
| Length of postoperative hospital stay (days) | 10 (11,17) | 9 (10,21) | 0.545 |
| Mild postoperative complications | | | 0.009 |
| No | 250 (78.9) | 54 (65.1) |  |
| Yes | 67 (21.1) | 29 (34.9) |  |
| Postoperative HAEC | | | < 0.001 |
| No | 232 (73.2) | 35 (42.2) |  |
| Yes | 85 (26.8) | 48 (57.8) |  |
| WBC1 (109/L) | 8.79 ± 2.39 | 12.74 ± 2.95 | < 0.001 |
| N1 (109/L) | 3.16 ± 1.43 | 4.79 ± 2.00 | < 0.001 |
| M1 (109/L) | 0.38 ± 0.22 | 0.65 ± 0.34 | < 0.001 |
| L1 (109/L) | 4.83 ± 1.85 | 6.58 ± 1.96 | < 0.001 |
| PLT1 (109/L) | 426.3 ± 133.2 | 497.3 ± 154.8 | < 0.001 |
| WBC2 (109/L) | 10.83 ± 3.30 | 14.90 ± 4.24 | < 0.001 |
| N2 (109/L) | 7.46 ± 3.16 | 9.56 ± 4.18 | < 0.001 |
| M2 (109/L) | 0.42 ± 0.22 | 0.60 ± 0.31 | < 0.001 |
| L2 (109/L) | 2.81 ± 1.48 | 4.41 ± 1.72 | < 0.001 |
| PLT2 (109/L) | 362.6 ± 107.1 | 390.4 ± 129.9 | 0.062 |
| WBC3 (109/L) | 9.64 ± 2.78 | 14.88 ± 3.41 | < 0.001 |
| N3 (109/L) | 4.63 ± 2.06 | 7.96 ± 2.98 | < 0.001 |
| M3 (109/L) | 0.53 ± 0.30 | 0.74 ± 0.39 | < 0.001 |
| L3 (109/L) | 3.86 ± 1.44 | 5.27 ± 1.98 | < 0.001 |
| PLT3 (109/L) | 383.9 ± 114.8 | 430.4 ± 135.8 | 0.027 |
| WBC4 (109/L) | 9.28 ± 2.41 | 14.28 ± 2.85 | < 0.001 |
| N4 (109/L) | 4.11 ± 1.64 | 6.20 ± 2.32 | < 0.001 |
| M4 (109/L) | 0.51 ± 0.27 | 0.81 ± 0.43 | < 0.001 |
| L4 (109/L) | 4.10 ± 1.46 | 6.19 ± 1.71 | < 0.001 |
| PLT4 (109/L) | 391.6 ± 119.1 | 455.3 ± 141.2 | < 0.001 |

**Abbreviations:** HAEC, Hirschsprung-associated enterocolitis; HSCR, Hirschsprung disease; S-HSCR, short segment HSCR; L-HSCR, long segment HSCR. WBC, white blood cells; WBC1, WBC at T1; N1, neutrophil count at T1; L1, lymphocyte count at T1; M1, monocyte count at T1; PLT1, platelet count at T1; WBC2, WBC at T2; N2, neutrophil count at T2; L2, lymphocyte count at T2; M2, monocyte count at T2; PLT2, platelet count at T2; WBC3, WBC at T3; N3, neutrophil count at T3; L3, lymphocyte count at T3; M3, monocyte count at T3; PLT3, platelet count at T3; WBC4, WBC at T4; N4, neutrophil count at T4; L4, lymphocyte count at T4; M4, monocyte count at T4; PLT4, platelet count at T4.

**Table S7** Baseline characteristics according to trajectory group of neutrophils

| Variables | Trajectory 1 (n = 237) | Trajectory 2 (n = 163) | P value |
| --- | --- | --- | --- |
| Sex | | | 0.055 |
| Male | 206 (86.9) | 130 (79.8) |  |
| Female | 31 (13.1) | 33 (20.2) |  |
| Gestational age (week) | | | 0.722 |
| ≥ 37 | 225 (94.9) | 156 (95.7) |  |
| < 37 | 12 (5.1) | 7 (4.3) |  |
| Birth weight (kg) | | | 0.787 |
| ≥ 2.5 | 227 (95.8) | 157 (96.3) |  |
| < 2.5 | 10 (4.2) | 6 (3.7) |  |
| Feeding method | | | 0.920 |
| Breast feeding | 137 (57.8) | 96 (58.9) |  |
| Mixed feeding | 49 (20.7) | 31 (19.0) |  |
| Formula feeding | 51 (21.5) | 36 (22.1) |  |
| Surgical age (month) | | | < 0.001 |
| ≤ 1 | 44 (18.5) | 26 (16.0) |  |
| > 1-12 | 137 (57.8) | 72 (44.2) |  |
| > 12-36 | 48 (20.3) | 40 (24.5) |  |
| > 36 | 8 (3.4) | 25 (15.3) |  |
| Preoperative nutritional status | | | 0.595 |
| Normal | 158 (66.7) | 116 (71.2) |  |
| Risk of malnutrition | 41 (17.3) | 26 (16.0) |  |
| Malnutrition | 38 (16.0) | 21 (12.8) |  |
| Preoperative HAEC | | | 0.447 |
| No | 158 (66.7) | 115 (70.6) |  |
| Yes | 78 (33.3) | 48 (29.4) |  |
| Preoperative hypoalbuminemia | | | 0.612 |
| No | 184 (77.6) | 130 (79.8) |  |
| Yes | 53 (22.4) | 33 (20.2) |  |
| Associated malformations | | | 0.462 |
| No | 220 (92.8) | 148 (90.8) |  |
| Yes | 17 (7.2) | 15 (9.2) |  |
| Residence | | | 0.059 |
| Urban | 111 (46.8) | 92 (56.4) |  |
| Rural | 126 (53.2) | 71 (43.6) |  |
| Relationship of caregivers | | | 0.629 |
| Parents | 195 (82.3) | 131 (80.4) |  |
| Others | 42 (17.7) | 32 (19.6) |  |
| Educational level of caregivers | | | 0.696 |
| Secondary and tertiary | 132 (55.7) | 94 (57.7) |  |
| Primary and below | 105 (44.3) | 69 (42.3) |  |
| Insurance type | | | 0.198 |
| Private or self-pay | 26 (11.0) | 25 (15.3) |  |
| Public | 211 (89.0) | 138 (84.7) |  |
| Type of HSCR | | | 0.982 |
| S-HSCR | 211 (89.0) | 145 (89.0) |  |
| L-HSCR | 26 (11.0) | 18 (11.0) |  |
| Surgical time (minute) | 138.8 ± 26.0 | 142.2 ± 24.2 | 0.060 |
| Length of postoperative hospital stay (days) | 9 (11,15) | 10 (11,23) | 0.028 |
| Mild postoperative complications | | | 0.790 |
| No | 179 (75.5) | 125 (76.7) |  |
| Yes | 58 (24.5) | 38 (23.3) |  |
| Postoperative HAEC | | | 0.011 |
| No | 170 (71.7) | 97 (59.5) |  |
| Yes | 67 (28.3) | 66 (40.5) |  |
| WBC1 (109/L) | 9.31 ± 2.73 | 10.05 ± 3.27 | 0.029 |
| N1 (109/L) | 3.08 ± 1.48 | 4.12 ± 1.80 | < 0.001 |
| M1 (109/L) | 0.44 ± 0.26 | 0.44 ± 0.29 | 0.552 |
| L1 (109/L) | 5.29 ± 1.97 | 5.05 ± 2.06 | 0.219 |
| PLT1 (109/L) | 441.2 ± 136.8 | 440.8 ± 146.8 | 0.924 |
| WBC2 (109/L) | 9.88 ± 3.14 | 14.16 ± 3.41 | < 0.001 |
| N2 (109/L) | 5.91 ± 2.50 | 10.68 ± 2.73 | < 0.001 |
| M2 (109/L) | 0.43 ± 0.25 | 0.49 ± 0.25 | 0.006 |
| L2 (109/L) | 3.32 ± 1.57 | 2.89 ± 1.50 | 0.024 |
| PLT2 (109/L) | 361.7 ± 108.7 | 377.6 ± 117.6 | 0.234 |
| WBC3 (109/L) | 10.32 ± 3.48 | 13.60 ± 3.70 | < 0.001 |
| N3 (109/L) | 4.73 ± 2.15 | 8.04 ± 3.00 | < 0.001 |
| M3 (109/L) | 0.56 ± 0.31 | 0.68 ± 0.41 | 0.081 |
| L3 (109/L) | 4.30 ± 1.80 | 4.22 ± 1.57 | 0.818 |
| PLT3 (109/L) | 388.9 ± 121.4 | 421.8 ± 125.0 | 0.201 |
| WBC4 (109/L) | 10.36 ± 3.33 | 10.28 ± 3.10 | 0.726 |
| N4 (109/L) | 4.31 ± 1.99 | 4.88 ± 1.95 | 0.002 |
| M4 (109/L) | 0.57 ± 0.32 | 0.58 ± 0.35 | 0.993 |
| L4 (109/L) | 4.78 ± 1.76 | 4.20 ± 1.64 | 0.001 |
| PLT4 (109/L) | 407.4 ± 125.3 | 401.6 ± 130.0 | 0.409 |

**Abbreviations:** HAEC, Hirschsprung-associated enterocolitis; HSCR, Hirschsprung disease; S-HSCR, short segment HSCR; L-HSCR, long segment HSCR. WBC, white blood cells; WBC1, WBC at T1; N1, neutrophil count at T1; L1, lymphocyte count at T1; M1, monocyte count at T1; PLT1, platelet count at T1; WBC2, WBC at T2; N2, neutrophil count at T2; L2, lymphocyte count at T2; M2, monocyte count at T2; PLT2, platelet count at T2; WBC3, WBC at T3; N3, neutrophil count at T3; L3, lymphocyte count at T3; M3, monocyte count at T3; PLT3, platelet count at T3; WBC4, WBC at T4; N4, neutrophil count at T4; L4, lymphocyte count at T4; M4, monocyte count at T4; PLT4, platelet count at T4.
